# Supplementary material for: Cost Estimation of Structural Components of a Building by considering the Seismic Load on Different Regions
Source: Hindawi journal article supplement (doi:10.1155/2019/7357913), 2019-01-01
Supplement: f1 [file 7357913.f1.pdf]

## Supplementary Material

Table S1: The dimension of RC beams

| Beam Type                                           | $I_e$ | Dimension based on zones |         |         |         |         |         |         |         |
|-----------------------------------------------------|-------|--------------------------|---------|---------|---------|---------|---------|---------|---------|
|                                                     |       | 10                       | 11      | 12      | 13      | 14      | 15      | 16      | 19      |
| A. Concrete area ( $A_C$ ), in mm <sup>2</sup>      |       |                          |         |         |         |         |         |         |         |
| Tie Beam                                            | 1.00  | 60,000                   | 60,000  | 60,000  | 60,000  | 60,000  | 60,000  | 80,000  | 80,000  |
|                                                     | 1.25  | 100,000                  | 100,000 | 100,000 | 100,000 | 100,000 | 100,000 | 100,000 | 100,000 |
|                                                     | 1.50  | 100,000                  | 100,000 | 100,000 | 100,000 | 100,000 | 100,000 | 100,000 | 100,000 |
| Floor Beam                                          | 1.00  | 100,000                  | 100,000 | 100,000 | 100,000 | 100,000 | 100,000 | 100,000 | 100,000 |
|                                                     | 1.25  | 100,000                  | 100,000 | 100,000 | 100,000 | 120,000 | 120,000 | 120,000 | 120,000 |
|                                                     | 1.50  | 100,000                  | 120,000 | 120,000 | 120,000 | 120,000 | 120,000 | 120,000 | 120,000 |
| Roof Beam                                           | 1.00  | 50,000                   | 50,000  | 50,000  | 50,000  | 60,000  | 60,000  | 60,000  | 60,000  |
|                                                     | 1.25  | 60,000                   | 60,000  | 60,000  | 60,000  | 60,000  | 60,000  | 60,000  | 60,000  |
|                                                     | 1.50  | 60,000                   | 60,000  | 60,000  | 75,000  | 75,000  | 75,000  | 75,000  | 75,000  |
| B. Reinforcement area ( $A_R$ ), in mm <sup>2</sup> |       |                          |         |         |         |         |         |         |         |
| Tie Beam                                            | 1.00  | 567                      | 586     | 586     | 600     | 714     | 767     | 713     | 641     |
|                                                     | 1.25  | 696                      | 728     | 716     | 747     | 807     | 934     | 923     | 877     |
|                                                     | 1.50  | 793                      | 822     | 809     | 816     | 1,056   | 1,200   | 1,236   | 1,148   |
| Floor Beam                                          | 1.00  | 679                      | 684     | 691     | 692     | 714     | 734     | 754     | 738     |
|                                                     | 1.25  | 747                      | 754     | 767     | 769     | 889     | 908     | 919     | 907     |
|                                                     | 1.50  | 819                      | 888     | 904     | 907     | 959     | 1,000   | 1,110   | 1,000   |
| Roof Beam                                           | 1.00  | 381                      | 381     | 381     | 381     | 380     | 388     | 397     | 393     |
|                                                     | 1.25  | 381                      | 385     | 390     | 392     | 399     | 409     | 454     | 409     |
|                                                     | 1.50  | 393                      | 460     | 463     | 465     | 515     | 538     | 502     | 497     |
| C. Longitudinal reinforcement ratio ( $RL$ ), in %  |       |                          |         |         |         |         |         |         |         |
| Tie Beam                                            | 1.00  | 0.95                     | 0.98    | 0.98    | 1.00    | 1.19    | 1.28    | 0.89    | 0.80    |
|                                                     | 1.25  | 0.70                     | 0.73    | 0.72    | 0.75    | 0.81    | 0.93    | 0.92    | 0.88    |
|                                                     | 1.50  | 0.79                     | 0.82    | 0.81    | 0.82    | 1.06    | 1.20    | 1.24    | 1.15    |
| Floor Beam                                          | 1.00  | 0.68                     | 0.68    | 0.69    | 0.69    | 0.71    | 0.73    | 0.75    | 0.74    |
|                                                     | 1.25  | 0.75                     | 0.75    | 0.77    | 0.77    | 0.74    | 0.76    | 0.77    | 0.76    |
|                                                     | 1.50  | 0.82                     | 0.74    | 0.75    | 0.76    | 0.80    | 0.83    | 0.93    | 0.83    |
| Roof Beam                                           | 1.00  | 0.76                     | 0.76    | 0.76    | 0.76    | 0.63    | 0.65    | 0.66    | 0.66    |
|                                                     | 1.25  | 0.64                     | 0.64    | 0.65    | 0.65    | 0.67    | 0.68    | 0.76    | 0.68    |
|                                                     | 1.50  | 0.66                     | 0.77    | 0.77    | 0.62    | 0.69    | 0.72    | 0.67    | 0.66    |

Table S2: The dimension of RC columns

| Column Type                                         | $I_e$ | Dimension based on zones |        |        |        |         |         |         |         |
|-----------------------------------------------------|-------|--------------------------|--------|--------|--------|---------|---------|---------|---------|
|                                                     |       | 10                       | 11     | 12     | 13     | 14      | 15      | 10      | 19      |
| A. Concrete area ( $A_C$ ), in mm <sup>2</sup>      |       |                          |        |        |        |         |         |         |         |
| 1st Floor                                           | 1.00  | 62,500                   | 62,500 | 62,500 | 62,500 | 90,000  | 90,000  | 90,000  | 90,000  |
|                                                     | 1.25  | 90,000                   | 90,000 | 90,000 | 90,000 | 90,000  | 90,000  | 90,000  | 90,000  |
|                                                     | 1.50  | 90,000                   | 90,000 | 90,000 | 90,000 | 122,500 | 122,500 | 122,500 | 122,500 |
| 2nd Floor                                           | 1.00  | 62,500                   | 62,500 | 62,500 | 62,500 | 90,000  | 90,000  | 90,000  | 90,000  |
|                                                     | 1.25  | 90,000                   | 90,000 | 90,000 | 90,000 | 90,000  | 90,000  | 90,000  | 90,000  |
|                                                     | 1.50  | 90,000                   | 90,000 | 90,000 | 90,000 | 122,500 | 122,500 | 122,500 | 122,500 |
| B. Reinforcement area ( $A_R$ ), in mm <sup>2</sup> |       |                          |        |        |        |         |         |         |         |
| 1st Floor                                           | 1.00  | 2,268                    | 3,054  | 3,402  | 3,402  | 1,608   | 2,036   | 2,512   | 2,268   |
|                                                     | 1.25  | 1,608                    | 1,608  | 2,412  | 2,412  | 3,054   | 3,768   | 4,561   | 3,768   |
|                                                     | 1.50  | 2,036                    | 3,054  | 3,402  | 3,402  | 1,884   | 3,054   | 3,041   | 2,512   |
| 2nd Floor                                           | 1.00  | 904                      | 1356   | 1,356  | 1,356  | 904     | 904     | 904     | 904     |
|                                                     | 1.25  | 904                      | 904    | 1,356  | 1,356  | 1,356   | 1,356   | 1,356   | 1,356   |
|                                                     | 1.50  | 904                      | 1356   | 1,356  | 1,356  | 1,356   | 1,356   | 1,232   | 1,232   |
| C. Longitudinal reinforcement ratio (RL), in %      |       |                          |        |        |        |         |         |         |         |
| 1st Floor                                           | 1.00  | 3.63                     | 4.89   | 5.44   | 5.44   | 1.79    | 2.26    | 2.79    | 2.52    |
|                                                     | 1.25  | 1.79                     | 1.79   | 2.68   | 2.68   | 3.39    | 4.19    | 5.07    | 4.19    |
|                                                     | 1.50  | 2.26                     | 3.39   | 3.78   | 3.78   | 1.54    | 2.49    | 2.48    | 2.05    |
| 2nd Floor                                           | 1.00  | 1.45                     | 2.17   | 2.17   | 2.17   | 1.00    | 1.00    | 1.00    | 1.00    |
|                                                     | 1.25  | 1.00                     | 1.00   | 1.51   | 1.51   | 1.51    | 1.51    | 1.51    | 1.51    |
|                                                     | 1.50  | 1.00                     | 1.51   | 1.51   | 1.51   | 1.11    | 1.11    | 1.01    | 1.01    |

Table S3: The quantity of work for RC beams

| Beam Type                                         | $I_e$ | Dimension based on zone |        |        |        |        |        |        |        |
|---------------------------------------------------|-------|-------------------------|--------|--------|--------|--------|--------|--------|--------|
|                                                   |       | 10                      | 11     | 12     | 13     | 14     | 15     | 16     | 19     |
| A. Concrete quantity ( $Q_c$ ), in m <sup>3</sup> |       |                         |        |        |        |        |        |        |        |
| Tie Beam                                          | 1.00  | 16.86                   | 16.86  | 16.86  | 16.86  | 16.86  | 16.86  | 22.48  | 22.48  |
|                                                   | 1.25  | 28.10                   | 28.10  | 28.10  | 28.10  | 28.10  | 28.10  | 28.10  | 28.10  |
|                                                   | 1.50  | 28.10                   | 28.10  | 28.10  | 28.10  | 28.10  | 28.10  | 28.10  | 28.10  |
| Floor Beam                                        | 1.00  | 28.10                   | 28.10  | 28.10  | 28.10  | 28.10  | 28.10  | 28.10  | 28.10  |
|                                                   | 1.25  | 28.10                   | 28.10  | 28.10  | 28.10  | 33.72  | 33.72  | 33.72  | 33.72  |
|                                                   | 1.50  | 28.10                   | 33.72  | 33.72  | 33.72  | 33.72  | 33.72  | 33.72  | 33.72  |
| Roof Beam                                         | 1.00  | 14.05                   | 14.05  | 14.05  | 14.05  | 16.86  | 16.86  | 16.86  | 16.86  |
|                                                   | 1.25  | 16.86                   | 16.86  | 16.86  | 16.86  | 16.86  | 16.86  | 16.86  | 16.86  |
|                                                   | 1.50  | 16.86                   | 16.86  | 16.86  | 21.08  | 21.08  | 21.08  | 21.08  | 21.08  |
| B. Reinforcement quantity ( $Q_R$ ), in kg        |       |                         |        |        |        |        |        |        |        |
| Tie Beam                                          | 1.00  | 3,075                   | 3,075  | 3,075  | 3,075  | 3,484  | 3,484  | 3,387  | 3,387  |
|                                                   | 1.25  | 4,242                   | 4,242  | 4,267  | 4,267  | 4,267  | 4,953  | 4,917  | 4,242  |
|                                                   | 1.50  | 4,242                   | 4,242  | 4,267  | 4,267  | 4,953  | 4,953  | 5,889  | 4,953  |
| Floor Beam                                        | 1.00  | 4,242                   | 4,242  | 4,242  | 4,242  | 4,242  | 4,242  | 4,242  | 4,242  |
|                                                   | 1.25  | 4,242                   | 4,242  | 4,242  | 4,242  | 4,267  | 4,267  | 4,404  | 4,404  |
|                                                   | 1.50  | 4,242                   | 4,242  | 4,242  | 4,242  | 4,953  | 5,116  | 5,280  | 5,116  |
| Roof Beam                                         | 1.00  | 2,520                   | 2,520  | 2,520  | 2,520  | 2,520  | 2,520  | 2,520  | 2,520  |
|                                                   | 1.25  | 2,520                   | 2,520  | 2,520  | 2,520  | 2,520  | 2,520  | 3,030  | 2,520  |
|                                                   | 1.50  | 2,520                   | 3,030  | 3,030  | 3,030  | 3,030  | 3,030  | 3,030  | 3,030  |
| C. Formwork quantity ( $Q_F$ ), in m <sup>2</sup> |       |                         |        |        |        |        |        |        |        |
| Tie Beam                                          | 1.00  | 252.90                  | 252.90 | 252.90 | 252.90 | 252.90 | 252.90 | 337.20 | 337.20 |
|                                                   | 1.25  | 337.20                  | 337.20 | 337.20 | 337.20 | 337.20 | 337.20 | 337.20 | 337.20 |
|                                                   | 1.50  | 337.20                  | 337.20 | 337.20 | 337.20 | 337.20 | 337.20 | 337.20 | 337.20 |
| Floor Beam                                        | 1.00  | 337.20                  | 337.20 | 337.20 | 337.20 | 337.20 | 337.20 | 337.20 | 337.20 |
|                                                   | 1.25  | 337.20                  | 337.20 | 337.20 | 337.20 | 337.20 | 337.20 | 337.20 | 337.20 |
|                                                   | 1.50  | 337.20                  | 337.20 | 337.20 | 337.20 | 337.20 | 337.20 | 337.20 | 337.20 |
| Roof Beam                                         | 1.00  | 210.75                  | 252.90 | 210.75 | 210.75 | 252.90 | 252.90 | 252.90 | 252.90 |
|                                                   | 1.25  | 252.90                  | 252.90 | 252.90 | 252.90 | 252.90 | 252.90 | 252.90 | 252.90 |
|                                                   | 1.50  | 252.90                  | 252.90 | 252.90 | 252.90 | 252.90 | 252.90 | 252.90 | 252.90 |

Table S4: The quantity of work for RC columns

| Column Type                                       | $I_e$ | Dimension based on zone |        |        |        |        |        |        |        |
|---------------------------------------------------|-------|-------------------------|--------|--------|--------|--------|--------|--------|--------|
|                                                   |       | 10                      | 11     | 12     | 10     | 14     | 15     | 10     | 19     |
| A. Concrete quantity ( $Q_C$ ), in m <sup>3</sup> |       |                         |        |        |        |        |        |        |        |
| 1st Floor                                         | 1.00  | 11.00                   | 11.00  | 11.00  | 11.00  | 15.84  | 15.84  | 15.84  | 15.84  |
|                                                   | 1.25  | 15.84                   | 15.84  | 15.84  | 15.84  | 15.84  | 15.84  | 15.84  | 15.84  |
|                                                   | 1.50  | 15.84                   | 15.84  | 15.84  | 15.84  | 21.56  | 21.56  | 21.56  | 21.56  |
| 2nd Floor                                         | 1.00  | 11.00                   | 11.00  | 11.00  | 11.00  | 15.84  | 15.84  | 15.84  | 15.84  |
|                                                   | 1.25  | 15.84                   | 15.84  | 15.84  | 15.84  | 15.84  | 15.84  | 15.84  | 15.84  |
|                                                   | 1.50  | 15.84                   | 15.84  | 15.84  | 15.84  | 21.56  | 21.56  | 21.56  | 21.56  |
| B. Reinforcement quantity ( $Q_R$ ), in kg        |       |                         |        |        |        |        |        |        |        |
| 1st Floor                                         | 1.00  | 4,497                   | 5,808  | 6,470  | 6,470  | 3,372  | 4,158  | 4,968  | 4,497  |
|                                                   | 1.25  | 3,372                   | 3,372  | 4,714  | 4,714  | 5,893  | 7,250  | 8,791  | 7,250  |
|                                                   | 1.50  | 4,158                   | 5,893  | 6,549  | 6,549  | 3,841  | 6,030  | 6,090  | 5,062  |
| 2nd Floor                                         | 1.00  | 1,809                   | 2,438  | 2,438  | 2,438  | 2,132  | 2,132  | 1,809  | 1,809  |
|                                                   | 1.25  | 1,954                   | 1,954  | 2,587  | 2,587  | 2,855  | 2,855  | 2,587  | 2,587  |
|                                                   | 1.50  | 1,954                   | 2,587  | 2,587  | 2,587  | 2,992  | 2,992  | 2,422  | 2,422  |
| C. Formwork quantity ( $Q_F$ ), in m <sup>2</sup> |       |                         |        |        |        |        |        |        |        |
| 1st Floor                                         | 1.00  | 176.00                  | 176.00 | 176.00 | 176.00 | 211.20 | 211.20 | 211.20 | 211.20 |
|                                                   | 1.25  | 211.20                  | 211.20 | 211.20 | 211.20 | 211.20 | 211.20 | 211.20 | 211.20 |
|                                                   | 1.50  | 211.20                  | 211.20 | 211.20 | 211.20 | 246.40 | 246.40 | 246.40 | 246.40 |
| 2nd Floor                                         | 1.00  | 176.00                  | 176.00 | 176.00 | 176.00 | 211.20 | 211.20 | 211.20 | 211.20 |
|                                                   | 1.25  | 211.20                  | 211.20 | 211.20 | 211.20 | 211.20 | 211.20 | 211.20 | 211.20 |
|                                                   | 1.50  | 211.20                  | 211.20 | 211.20 | 211.20 | 246.40 | 246.40 | 246.40 | 246.40 |

Table S5: The cost of RC beams components

| Beam type              | $I_e$ | Cost of RC components per zone (in thousand IDR) |        |        |        |        |        |         |        |
|------------------------|-------|--------------------------------------------------|--------|--------|--------|--------|--------|---------|--------|
|                        |       | 10                                               | 11     | 12     | 13     | 14     | 15     | 16      | 19     |
| A. Concrete works      |       |                                                  |        |        |        |        |        |         |        |
| Tie beam               | 1.00  | 20,806                                           | 20,806 | 20,806 | 20,806 | 20,806 | 20,806 | 27,742  | 27,742 |
|                        | 1.25  | 34,677                                           | 34,677 | 34,677 | 34,677 | 34,677 | 34,677 | 34,677  | 34,677 |
|                        | 1.50  | 34,677                                           | 34,677 | 34,677 | 34,677 | 34,677 | 34,677 | 34,677  | 34,677 |
| Floor beam             | 1.00  | 34,677                                           | 34,677 | 34,677 | 34,677 | 34,677 | 34,677 | 34,677  | 34,677 |
|                        | 1.25  | 34,677                                           | 34,677 | 34,677 | 34,677 | 41,613 | 41,613 | 41,613  | 41,613 |
|                        | 1.50  | 34,677                                           | 34,677 | 34,677 | 41,613 | 41,613 | 41,613 | 48,548  | 41,613 |
| Roof beam              | 1.00  | 17,339                                           | 17,339 | 17,339 | 17,339 | 20,806 | 20,806 | 20,806  | 20,806 |
|                        | 1.25  | 20,806                                           | 20,806 | 20,806 | 20,806 | 20,806 | 20,806 | 20,806  | 20,806 |
|                        | 1.50  | 20,806                                           | 20,806 | 20,806 | 26,008 | 26,008 | 26,008 | 26,008  | 26,008 |
| B. Reinforcement works |       |                                                  |        |        |        |        |        |         |        |
| Tie beam               | 1.00  | 55,044                                           | 55,044 | 55,044 | 55,044 | 62,847 | 62,847 | 60,101  | 60,101 |
|                        | 1.25  | 75,952                                           | 75,952 | 76,440 | 76,440 | 76,440 | 89,522 | 88,830  | 75,952 |
|                        | 1.50  | 75,952                                           | 75,952 | 76,440 | 76,440 | 89,522 | 89,522 | 107,380 | 89,522 |
| Floor beam             | 1.00  | 75,952                                           | 75,952 | 75,952 | 75,952 | 70,600 | 70,600 | 70,194  | 70,194 |
|                        | 1.25  | 75,952                                           | 75,952 | 75,952 | 75,952 | 76,440 | 76,440 | 78,597  | 78,597 |
|                        | 1.50  | 75,952                                           | 79,086 | 75,952 | 79,086 | 89,522 | 92,189 | 94,856  | 92,189 |
| Roof beam              | 1.00  | 94,639                                           | 94,639 | 94,639 | 94,639 | 94,639 | 94,639 | 94,639  | 94,639 |
|                        | 1.25  | 94,639                                           | 94,639 | 94,639 | 94,639 | 94,639 | 94,639 | 94,639  | 94,639 |
|                        | 1.50  | 94,639                                           | 94,639 | 94,639 | 94,639 | 94,639 | 94,639 | 94,639  | 94,639 |
| C. Formworks           |       |                                                  |        |        |        |        |        |         |        |
| Tie beam               | 1.00  | 41,143                                           | 41,143 | 41,143 | 41,143 | 41,143 | 41,143 | 54,857  | 54,857 |
|                        | 1.25  | 54,857                                           | 54,857 | 54,857 | 54,857 | 54,857 | 54,857 | 54,857  | 54,857 |
|                        | 1.50  | 54,857                                           | 54,857 | 54,857 | 54,857 | 54,857 | 54,857 | 54,857  | 54,857 |
| Floor beam             | 1.00  | 44,918                                           | 44,918 | 44,918 | 44,918 | 48,225 | 48,225 | 47,578  | 47,578 |
|                        | 1.25  | 47,578                                           | 47,578 | 47,578 | 47,578 | 48,225 | 48,225 | 51,160  | 47,578 |
|                        | 1.50  | 47,578                                           | 53,740 | 47,578 | 53,740 | 61,119 | 61,119 | 59,152  | 59,152 |
| Roof beam              | 1.00  | 59,149                                           | 59,149 | 59,149 | 59,149 | 70,979 | 70,979 | 70,979  | 70,979 |
|                        | 1.25  | 70,979                                           | 70,979 | 70,979 | 70,979 | 70,979 | 70,979 | 70,979  | 70,979 |
|                        | 1.50  | 70,979                                           | 70,979 | 70,979 | 70,979 | 70,979 | 70,979 | 70,979  | 70,979 |

Table S6: The cost of RC columns components

| Column type            | $I_e$ | Cost of RC components per zone (in thousand IDR) |         |         |         |         |         |         |         |
|------------------------|-------|--------------------------------------------------|---------|---------|---------|---------|---------|---------|---------|
|                        |       | 10                                               | 11      | 12      | 13      | 14      | 15      | 16      | 19      |
| A. Concrete works      |       |                                                  |         |         |         |         |         |         |         |
| 1st Floor              | 1.00  | 13,575                                           | 13,575  | 13,575  | 13,575  | 19,548  | 19,548  | 19,548  | 19,548  |
|                        | 1.25  | 19,548                                           | 19,548  | 19,548  | 19,548  | 19,548  | 19,548  | 19,548  | 19,548  |
|                        | 1.50  | 19,548                                           | 19,548  | 19,548  | 19,548  | 26,607  | 26,607  | 26,607  | 26,607  |
| 2nd Floor              | 1.00  | 13,575                                           | 13,575  | 13,575  | 13,575  | 19,548  | 19,548  | 19,548  | 19,548  |
|                        | 1.25  | 19,548                                           | 19,548  | 19,548  | 19,548  | 19,548  | 19,548  | 19,548  | 19,548  |
|                        | 1.50  | 19,548                                           | 19,548  | 19,548  | 19,548  | 26,607  | 26,607  | 26,607  | 26,607  |
| B. Reinforcement works |       |                                                  |         |         |         |         |         |         |         |
| 1st Floor              | 1.00  | 84,225                                           | 109,257 | 121,882 | 121,882 | 62,363  | 77,365  | 93,223  | 84,225  |
|                        | 1.25  | 62,363                                           | 62,363  | 87,976  | 87,976  | 110,479 | 136,365 | 165,789 | 136,365 |
|                        | 1.50  | 77,365                                           | 110,479 | 122,989 | 122,989 | 70,929  | 112,706 | 114,239 | 94,623  |
| 2nd Floor              | 1.00  | 32,936                                           | 44,949  | 44,949  | 44,949  | 38,712  | 38,712  | 32,936  | 32,936  |
|                        | 1.25  | 35,313                                           | 35,313  | 47,400  | 47,400  | 52,499  | 52,499  | 47,400  | 47,400  |
|                        | 1.50  | 35,313                                           | 47,400  | 47,400  | 47,400  | 54,727  | 54,727  | 44,238  | 44,238  |
| C. Formworks           |       |                                                  |         |         |         |         |         |         |         |
| 1st Floor              | 1.00  | 47,590                                           | 47,590  | 47,590  | 47,590  | 57,108  | 57,108  | 57,108  | 57,108  |
|                        | 1.25  | 57,108                                           | 57,108  | 57,108  | 57,108  | 57,108  | 57,108  | 57,108  | 57,108  |
|                        | 1.50  | 57,108                                           | 57,108  | 57,108  | 57,108  | 66,626  | 66,626  | 66,626  | 66,626  |
| 2nd Floor              | 1.00  | 47,590                                           | 47,590  | 47,590  | 47,590  | 57,108  | 57,108  | 57,108  | 57,108  |
|                        | 1.25  | 57,108                                           | 57,108  | 57,108  | 57,108  | 57,108  | 57,108  | 57,108  | 57,108  |
|                        | 1.50  | 57,108                                           | 57,108  | 57,108  | 57,108  | 66,626  | 66,626  | 66,626  | 66,626  |
